# Supplementary material
Source: publisher figshare collection journal article supplement (https://tandf.figshare.com/ndownloader/files/15379973)
Supplement: Supplementary file 1 [file 15379973]

**Comparison of the toxicity of waters containing initially sulfaquinoxaline after photocatalytic treatment by TiO2 and polyaniline/TiO2**

Nahid Sandiklya , Mounir Kassirb, Mouhieddine El Jamalc, Hosni Takached, Philippe Arnouxe, Samia Mokha f, Mohammad Al-Iskandarania, Thibault Roques-Carmese

**Supporting information S1: Kinetic of adsorption of sulfaquinoxaline (SQX) onto the catalysts**

Table S1. Kinetic analysis of the adsorption of SQX onto TiO2 and PANI/TiO2 catalysts at various pH. The SQX adsorbed amount is calculated from the difference between the initial pollutant concentration (Cinitial = 7 mg L-1) and the concentration at time of adsorption tads (Ctads) taking into account the volume of the solution (V = 100 mL) and the mass of catalyst (m = 0.1 g): .

| Time of adsorption  (tads) | Acidic  pH 4 | | Neutral  pH 7 | | Basic  pH 12 | |
| --- | --- | --- | --- | --- | --- | --- |
| TiO2   (mg/g) | PANI/TiO2    (mg/g) | TiO2    (mg/g) | PANI/TiO2    (mg/g) | TiO2   (mg/g) | PANI/TiO2    (mg/g) |
| tads = 15 min | 1024 | 322 | 0.2 | 2403 | 13 | 1534 |
| tads =30 min | 1168 | 420 | 1 | 2730 | 21 | 1820 |
| tads =45 min | 1192 | 405 | 1.4 | 2733 | 20 | 1811 |
| tads = 60 min | 1163 | 423 | 0.9 | 2732 | 22 | 1819 |

**Supporting information S2: Toxicity tests**


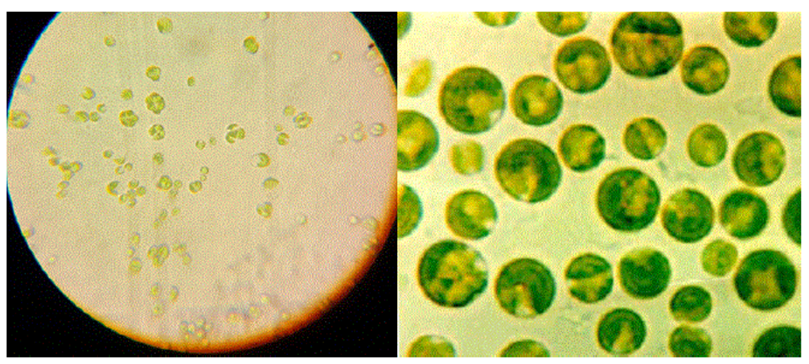


**Figure. S1.** Microscopic images of the unicellular green algae *Chlorella vulgaris*.


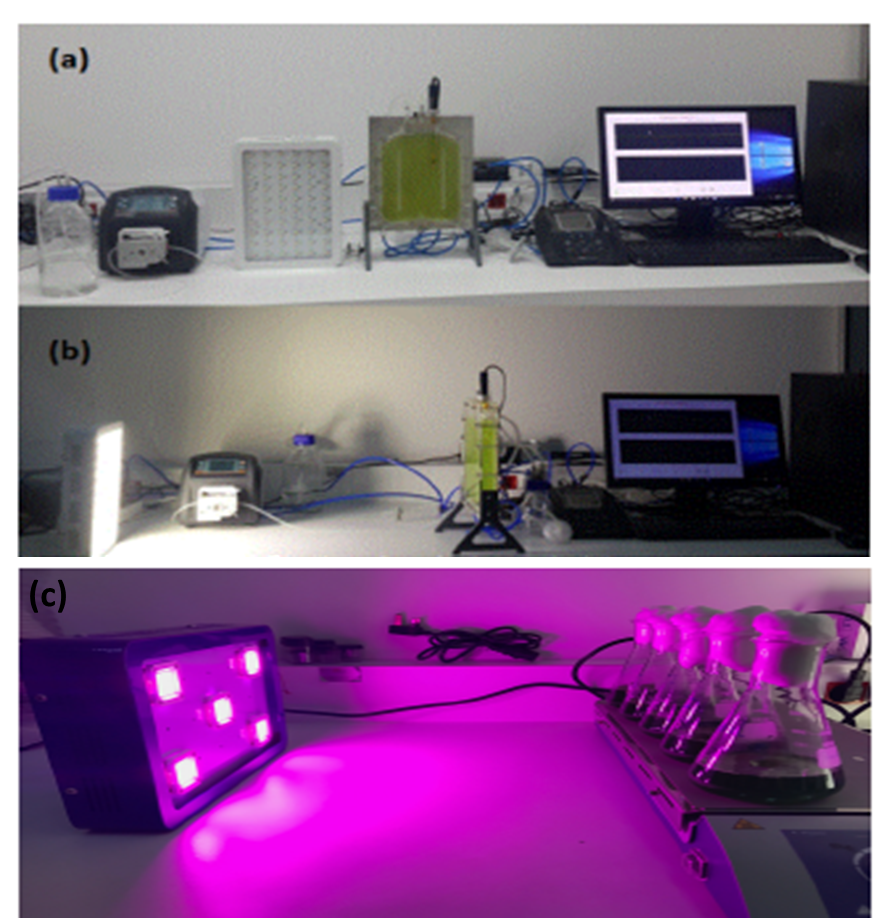


**Figure. S2.** The experimental setup used for the growth of the unicellular green algae *Chlorella vulgaris*.


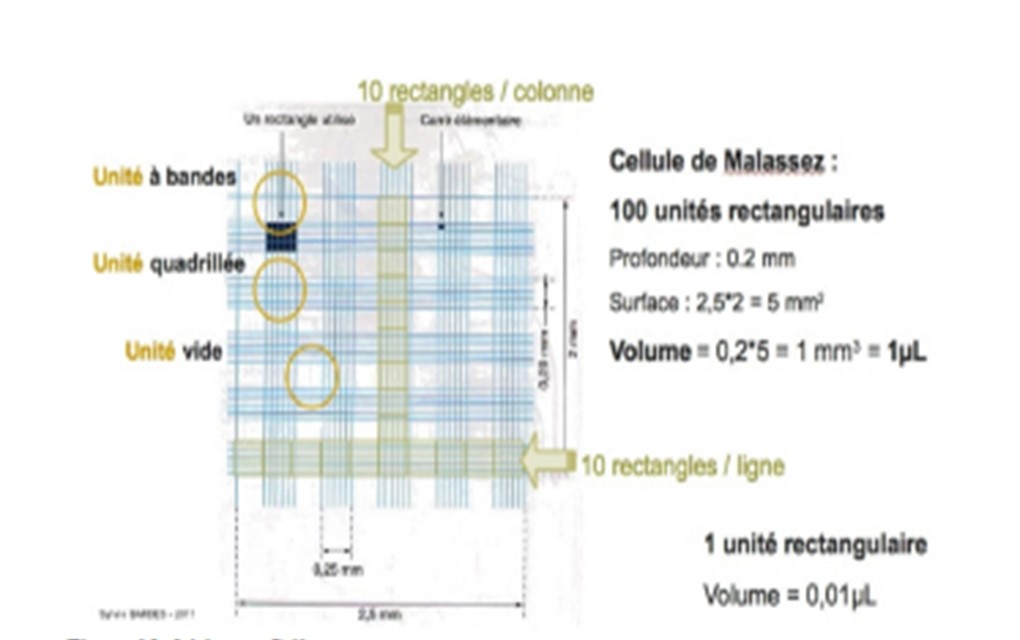


**Figure. S3.** Schematic representation of the Malassez cell used for cells counting.

**Supporting information S3: Measurements of hydroxyl radicals (HO•) by HPF probe**


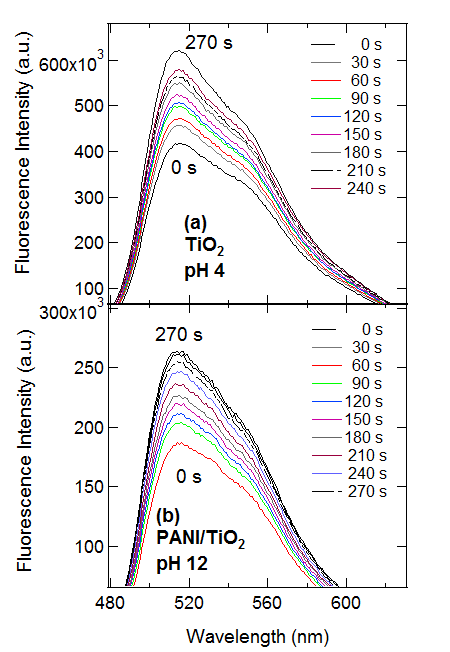


Figure. S4. The temporal evolution of the fluorescence spectra of HPF in the presence of (a) TiO2 at pH 4, and (b) PANI/TiO2 at pH 12 excited at 254 nm.


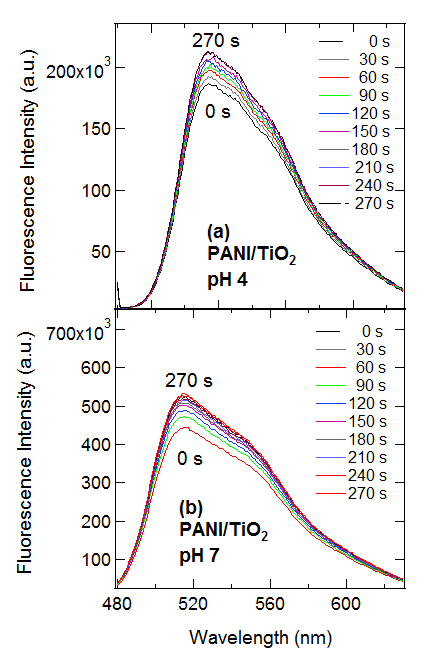


Figure. S5. The temporal evolution of the fluorescence spectra of HPF in the presence of (a) PANI/TiO2 at pH 4, and (b) PANI/TiO2 at pH 7 excited at 254 nm.
